# Supplementary figures and images for: Prediction of α-Solanine and α-Chaconine in Potato Tubers from Hunter Color Values and VIS/NIR Spectra
Source: Hindawi journal article supplement (doi:10.1155/2020/8884219), 2020-11-17

# Graphic abstract

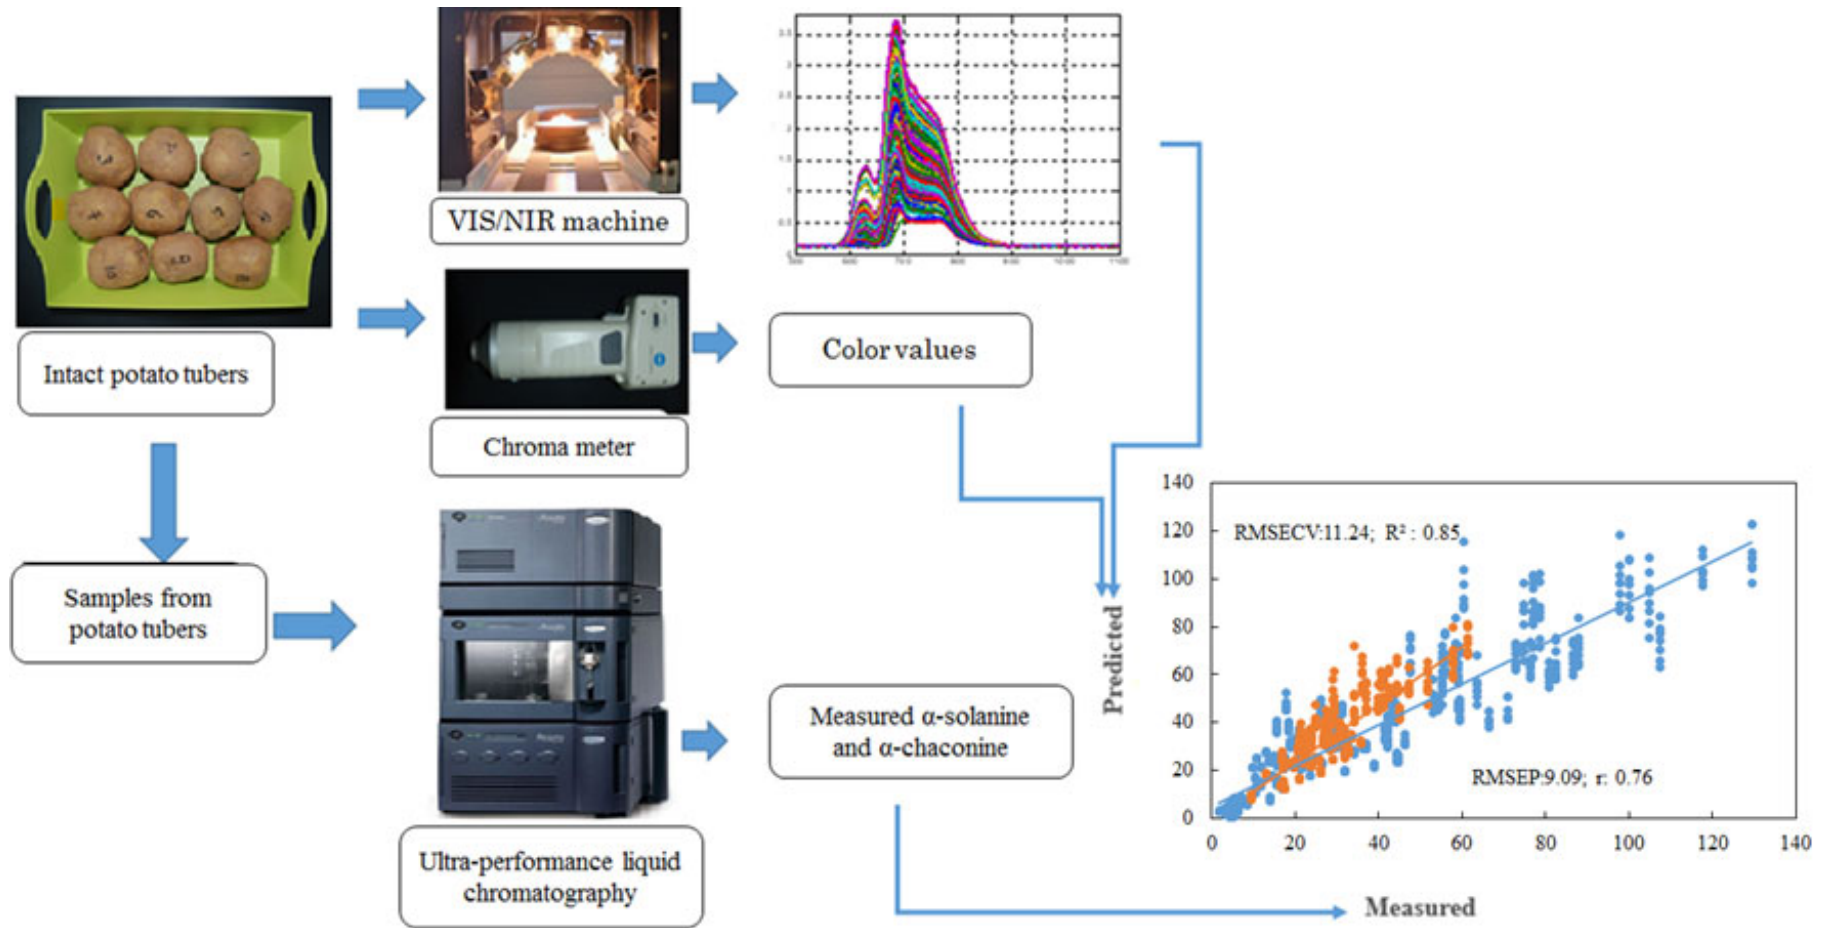

Supplement: f1 [file 8884219.f1.pdf]
